# Supplementary material for: A new 3D metallic, ductile, and porous boron nitride as a promising anode material for sodium-ion batteries
Source: Royal Society of Chemistry journal article supplement (doi:10.1039/d4cp04297b), 2025-01-01
Supplement: d4cp04297b1.pdf [file d4cp04297b1.pdf]

## Supplementary Information

### A new 3D metallic, ductile, and porous boron nitride as a promising anode material for sodium-ion battery

Wei Sun <sup>a</sup>, Qian Wang <sup>a,\*</sup>, and Puru Jena <sup>b</sup>

<sup>a</sup> School of Materials Science and Engineering, CAPT, Peking University, Beijing 100871, China. \* Corresponding author. E-mail: qianwang2@pku.edu.cn

<sup>b</sup> Department of Physics, Institute for Sustainable Energy and Environment, Virginia Commonwealth University, Richmond, VA 23284, USA

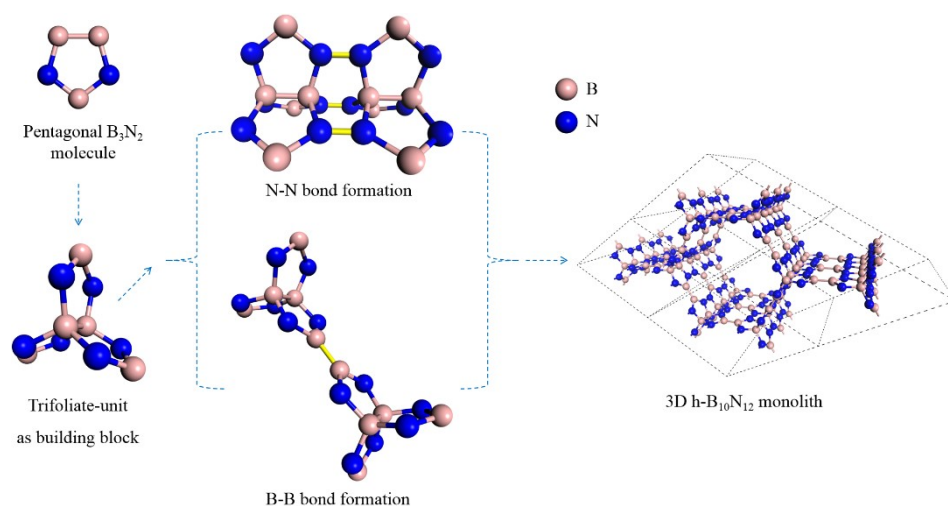

**Figure S1.** Proposed synthesis pathway of using the bottom-up assembly from pentagonal B<sub>3</sub>N<sub>2</sub> molecule to the 3D h-B<sub>10</sub>N<sub>12</sub> monolith.

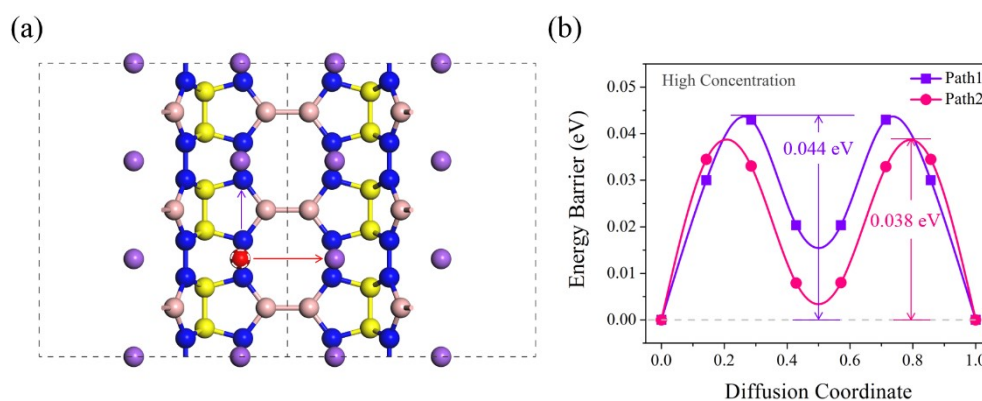

**Figure S2.** (a) Diffusion paths of Na-ions in high concentration, and (b) corresponding diffusion energy barrier profiles of h-B<sub>10</sub>N<sub>12</sub>.

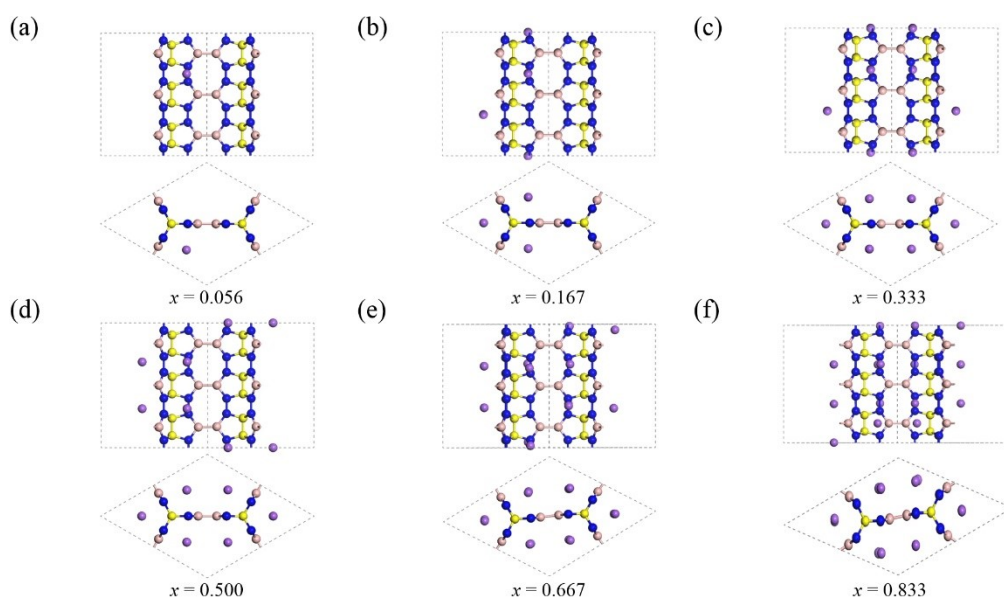

**Figure S3.** Selected energetically most favorable adsorption configurations of h-B<sub>10</sub>N<sub>12</sub> with Na-ion concentrations of (a)  $x = 0.056$ , (b)  $x = 0.167$ , (c)  $x = 0.333$ , (d)  $x = 0.500$ , (e)  $x = 0.667$ , and (f)  $x = 0.833$ .

**Table S1.** Comparison h-B<sub>10</sub>N<sub>12</sub> with some previously reported boron nitrides in terms of metallicity, porosity, ductility, and their application as SIB anode materials.

| Structure                                     | Metallic | Porous | Ductile | SIB anode |
|-----------------------------------------------|----------|--------|---------|-----------|
| h-B <sub>10</sub> N <sub>12</sub> [This work] | √        | √      | √       | √         |
| HCBN-1/2 [22]                                 | √        | √      | √       | ×         |
| 3D-B <sub>2</sub> N <sub>2</sub> [27]         | ×        | √      | √       | √         |
| (P-6M2)-BN [21]                               | √        | √      | √       | ×         |
| (IMM2)-BN [21]                                | √        | √      | ×       | ×         |
| penta-B <sub>4</sub> N <sub>7</sub> [25]      | √        | √      | ×       | ×         |
| 1z1-BN [27,54]                                | ×        | √      | ×       | √         |
| T-B <sub>3</sub> N <sub>3</sub> [20]          | √        | ×      | ×       | ×         |
| M-BN [23]                                     | √        | ×      | ×       | ×         |
| <i>t</i> -BN <sub>2</sub> [24]                | √        | ×      | ×       | ×         |
| <i>t</i> P-BN [72]                            | √        | ×      | ×       | ×         |
| oA-B <sub>3</sub> N <sub>5</sub> [73]         | √        | ×      | ×       | ×         |
| B <sub>28</sub> N <sub>32</sub> [74]          | √        | ×      | ×       | ×         |

## Reference

- [72] M. Xiong, Z. Gao, K. Luo, F. Ling, Y. Gao, C. Chen, D. Yu, Z. Zhao, S. Wei, Three metallic BN polymorphs: 1D multi-threaded conduction in a 3D network, *Phys. Chem. Chem. Phys.* 22 (2020) 489-496.
- [73] M. Xiong, Q. Zhang, M. Gao, Y. Zhou, D. Jin, M. Ma, F. Mao, C. Zhang, Z. Yuan, S. Wei, Prediction of three-dimensional B<sub>3</sub>N<sub>5</sub> with one-dimensional metallicity, *Chem. Phys. Lett.* 760 (2020) 138002.
- [74] M. Xiong, Z. Yuan, F. Mao, X. Wang, D. Jin, Q. Zhang, D. Yu, C. Wang, S. Wei, Superhard B<sub>28</sub>N<sub>32</sub> with three-dimensional metallicity: First-principles prediction, *Comput. Mater. Sci.* 188 (2021) 110121.
